# Supplementary material for: Cell Origin and iNOS Function Are Critical to Macrophage Activation Following Acute Lung Injury
Source: Frontiers journal article supplement (doi:10.3389/fphar.2021.761496), 2022-01-25
Supplement: Image_1.pdf [file Image_1.pdf]

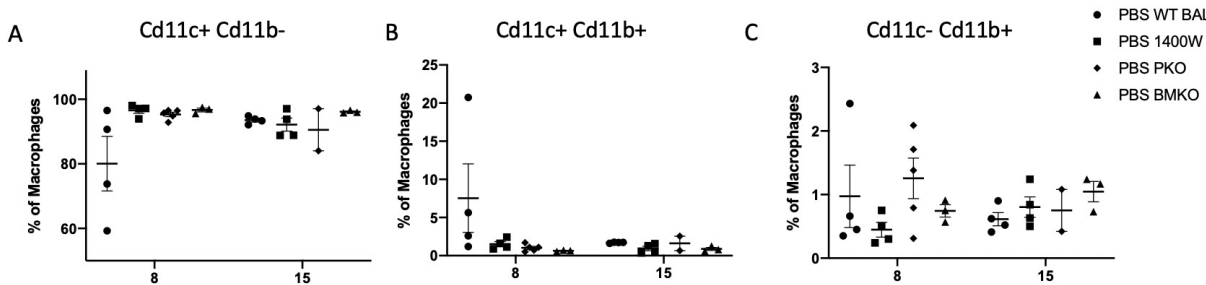

**D**

|       |               | 8 Days    |       |        |       |        |       |        |      | 15 Days   |      |        |       |        |        |        |       |
|-------|---------------|-----------|-------|--------|-------|--------|-------|--------|------|-----------|------|--------|-------|--------|--------|--------|-------|
|       |               | Wild Type |       | 1400W  |       | PKO    |       | BMKO   |      | Wild Type |      | 1400W  |       | PKO    |        | BMKO   |       |
|       |               | Mean      | SE    | Mean   | SE    | Mean   | SE    | Mean   | SE   | Mean      | SE   | Mean   | SE    | Mean   | SE     | Mean   | SE    |
| Cd206 | Cd11c+ Cd11b- | 682       | 39.2  | 956    | 307.8 | 699    | 70.7  | 543    | 15.0 | 661       | 4.9  | 543    | 23.6  | 682    | 86.8   | 549    | 24.1  |
|       | Cd11c+ Cd11b+ | 1865      | 700.3 | 958    | 131.5 | 1135   | 162.9 | 624    | 8.3  | 1291      | 51.9 | 1126   | 116.2 | 1154   | 122.3  | 627    | 70.9  |
|       | Cd11c- Cd11b+ | 436       | 75.5  | 446    | 19.3  | 592    | 65.6  | 370    | 57.5 | 429       | 30.8 | 468    | 43.4  | 696    | 103.4  | 225    | 2.3   |
| Ly6C  | Cd11c+ Cd11b- | 1060.5    | 37.9  | 1168.5 | 171.1 | 1226.4 | 118.8 | 1013.8 | 30.1 | 1361.3    | 23.5 | 1243.7 | 57.1  | 1471.8 | 267.4  | 1150.3 | 33.9  |
|       | Cd11c+ Cd11b+ | 1713.5    | 304.9 | 1598.0 | 186.7 | 1764.7 | 303.1 | 1115.3 | 66.3 | 1719.3    | 70.7 | 2365.9 | 270.1 | 3049.2 | 1037.0 | 1425.1 | 171.8 |
|       | Cd11c- Cd11b+ | 524.8     | 70.2  | 437.7  | 32.2  | 351.6  | 71.3  | 348.8  | 46.5 | 688.4     | 75.6 | 670.5  | 50.9  | 329.3  | 40.3   | 401.3  | 21.5  |

Supplementary Figure 1. BAL macrophage population maturity and phenotype are similar in PBS instilled controls. PBS instilled in wild type (circle), had similar proportion of mature (A), intermediate (B), and immature (C) macrophages as those also administered 1400W (square), PKO chimeras (diamond), and BMKO chimeras (triangle). Cd206 and Ly6C expression, as represented by MFI, remained constant across PBS instilled animals (D).
